# Supplementary material for: Genome-Wide Identification and Expression Analysis of the MADS-Box Family in Ginkgo biloba
Source: MDPI journal article supplement (doi:10.3390/f13111953), 2022-11-18
Supplement: s1 [file s1]

**Table S2.** Conserved motif sequence of GbMADS family gene in *G.biloba*

| motif No. | e-value  | Length (aa) | Consensus sequence                                 |
|-----------|----------|-------------|----------------------------------------------------|
| motif 1   | 1.1e-799 | 50          | MGRGKIEJKRIENKTNRQVTFSKRRNGLLKKASELSILCDAEVALIIFSP |
| motif 2   | 2.5e-097 | 50          | LQQTQRHMIGEDLGSLSLKELQQLERQLEIAJNRVRSRKNQJLLEZIEIL |
| motif 3   | 1.7e-067 | 50          | DFIQYQLLHTPPVEHHNFFQPAMNTDISDQYSSPPGPSSSSWNRTEYGYV |
| motif 4   | 1.6e-061 | 50          | FWWEDTKNNPAAKYHKLFKLELIAKRADGIARPATTDETAGVNNQESDRD |
| motif 5   | 2.2e-061 | 10          | TGKJYEFASP                                         |
| motif 6   | 1.7e-053 | 50          | GIEMEAPLLLFTQSKSNEGEGAATTYDQSCVKQQTSEPPLVNMTSSCT   |
| motif 7   | 9.0e-053 | 50          | GQIPGPAQPQPAFPPALLPPPSPLPLPPPPHIPLPPPSPTFANNQN     |
| motif 8   | 7.0e-044 | 50          | DHLVHKLLRLDPLPPPPAPENFQLHLTQHASLQERYQREKVLNKALKLRD |
| motif 9   | 8.0e-014 | 11          | SMKKTJERYRK                                        |
| motif 10  | 1.8e-010 | 50          | QDKKKMDNFSFLQQQNKKLDKELKKKWIQNRHLEIENVYPSWDPRLDNYT |
