# Supplementary material for: Genome-Wide Identification and Expression Analysis of the MADS-Box Family in Ginkgo biloba
Source: MDPI journal article supplement (doi:10.3390/f13111953), 2022-11-18
Supplement: s1 [file s1]

**Table S1.** qRT-PCR primer sequences of *GbMADS* genes.

| Gene Name       | Forward primer (5'–3') | Reverse primer (5'–3')  |
|-----------------|------------------------|-------------------------|
| <i>GbMADS1</i>  | CAGAGCTACCACTCCATCATAC | CGAGACCATGTTCTAGATTCC   |
| <i>GbMADS2</i>  | GATTCTCTGTGATGCCGAAGT  | CCTCTCCCAAGACAGTACTAGAT |
| <i>GbMADS3</i>  | GCTTCATTTGGCCTCTCTAGT  | CTTGGGTACTGGTCAGCATATT  |
| <i>GbMADS4</i>  | CGCCCAACTAGAGATGGAAATA | TCTTCGTCGACCGCATTATC    |
| <i>GbMADS5</i>  | TACTCCGCCAGGGACAATAA   | CTAGACTGCACACCTCGTATCT  |
| <i>GbMADS6</i>  | AGCAAAGGCGCTACACAT     | GCACGAAGAGGACTGATAAGAG  |
| <i>GbMADS7</i>  | GAGGCTTTGGACTTGCATAAAG | AGTGGGAGAAAGGTGCATAAA   |
| <i>GbMADS8</i>  | GAATGGGCTGCTCAAGAAAG   | GCACTGGCAAACCTCGTAAAG   |
| <i>GbMADS9</i>  | AGACTTTGAGGCATATGATGGG | CGGACTCGAGATGATGCTATTT  |
| <i>GbMADS10</i> | GCCGTGGAAGATTGAGATAA   | CGCTTTCTTCAACAGACCATT   |
| <i>GbMADS11</i> | GGTGGAAGTCAAACGGATACA  | CAACATCGCAGAGAACAGAAAG  |
| <i>GbMADS12</i> | CGAGAAGAAGAGTGAACGACAG | CGTCCACTCCGCACATAATAG   |
| <i>GbMADS13</i> | GGAGTGGAAGTGGGTTTCAT   | GTGGACGATTATGGAGTCTGTG  |
| <i>GbMADS14</i> | GTGATGGGCAACGACTTAAAC  | CCTTAGGCTCTCCATTCTTCT   |
| <i>GbMADS15</i> | GGAGCTGAAGCGTATCCAAA   | TTCCGCATCGCACAGAATAG    |
| <i>GbMADS16</i> | GCCAAATGGAACAGACACAAG  | CATCGCAAGCATGGCATTAG    |
| <i>GbMADS17</i> | AGAGCAGGGCAAGATGAATAA  | CGAGGATCCCAAGAAGGATAAA  |
| <i>GbMADS18</i> | CGAACTACCGCCTGAATGAA   | CACTTCGGCTCACAGATTGA    |
| <i>GbMADS19</i> | ACGGCCGGCGTTAATAAT     | TTCTCCCTCGTTGGATTGG     |
| <i>GbMADS20</i> | GGAGCTGAAGCGCATACAA    | TTCCGCATCGCACAGAATAG    |
| <i>GbMADS21</i> | GCTGAGAGAGCTACTGGACTAT | CCTGCATAGTGTCTCCACATC   |
| <i>GbMADS22</i> | GCTTACACTCTCATCCCTCTTT | CCCATCGTACTCTCCCAATTC   |
| <i>GbMADS23</i> | GAGTGTAGTCCAGACAACCAAA | AGATCCCAAGTCTTACCAATC   |
| <i>GbMADS24</i> | ACGGCCGGCGTTAATAAT     | TTCTCCCTCGTTGGATTGG     |
| <i>GbMADS25</i> | CTGAAGCGGATCGAGAACAA   | CACAAGATGGACAGCTCACA    |
| <i>GbMADS26</i> | TCGTCCTGTGTCTTGAATGTC  | ATCGTAGTCGTCTCGTCTAA    |
