# Supplementary material for: Genome-Wide Identification and Expression Analysis of the MADS-Box Family in Ginkgo biloba
Source: MDPI journal article supplement (doi:10.3390/f13111953), 2022-11-18
Supplement: s1 [file s1]

**Table S3.** List of relationship between *GbMADS* gene and miRNA.

| Gene Name       | MiRNA                                                                                                      |
|-----------------|------------------------------------------------------------------------------------------------------------|
| <i>GbMADS1</i>  | novel_miR_1276                                                                                             |
| <i>GbMADS4</i>  | novel_miR_1791; novel_miR_2627; novel_miR_3079                                                             |
| <i>GbMADS5</i>  | novel_miR_2323                                                                                             |
| <i>GbMADS6</i>  | novel_miR_3356                                                                                             |
| <i>GbMADS7</i>  | novel_miR_1559 (MIR5067); novel_miR_2226; novel_miR_2350; novel_miR_2408; novel_miR_2489;<br>novel_miR_379 |
| <i>GbMADS9</i>  | novel_miR_132; novel_miR_1673                                                                              |
| <i>GbMADS10</i> | novel_miR_3186; novel_miR_435                                                                              |
| <i>GbMADS11</i> | novel_miR_2295; novel_miR_2734                                                                             |
| <i>GbMADS15</i> | novel_miR_322 (MIR396); novel_miR_3356                                                                     |
| <i>GbMADS16</i> | novel_miR_11; novel_miR_1143; novel_miR_1642; novel_miR_1657; novel_miR_2463; novel_miR_598                |
| <i>GbMADS20</i> | novel_miR_322 (MIR396); novel_miR_3356                                                                     |
| <i>GbMADS21</i> | novel_miR_1597; novel_miR_2393                                                                             |
| <i>GbMADS22</i> | novel_miR_3356; novel_miR_2558                                                                             |
| <i>GbMADS23</i> | novel_miR_3356                                                                                             |
| <i>GbMADS25</i> | novel_miR_1291 (MIR7717); novel_miR_399                                                                    |
| <i>GbMADS26</i> | novel_miR_2113; novel_miR_3126                                                                             |
